# Supplementary material for: Energy use and carbon footprints differ dramatically for diverse wastewater-derived carbonaceous substrates: An integrated exploration of biokinetics and life-cycle assessment
Source: PubMed Central journal article supplement (PMC5428015; doi:10.1038/s41598-017-00245-1), 2017-03-21
Supplement: 41598_2017_245_MOESM1_ESM.pdf [file 41598_2017_245_MOESM1_ESM.pdf]

## Supplementary Information

(6 pages, 1 figure, 2 tables)

### **Energy use and carbon footprints differ dramatically for diverse wastewater-derived carbonaceous substrates: An integrated exploration of biokinetics and life-cycle assessment**

Yanbo Li<sup>1,2,†</sup>, Xu Wang<sup>1,3,\*†</sup>, David Butler<sup>4</sup>, Junxin Liu<sup>1,2</sup>, Jiuhui Qu<sup>1,5</sup>

<sup>1</sup> Research Center for Eco-Environmental Sciences, the Chinese Academy of Sciences, Beijing 100085, China

<sup>2</sup> University of Chinese Academy of Sciences, Beijing 100049, China

<sup>3</sup> State Key Joint Laboratory of Environmental Simulation and Pollution Control, Research Center for Eco-Environmental Sciences, the Chinese Academy of Sciences, Beijing 100085, China

<sup>4</sup> Centre for Water Systems, College of Engineering, Mathematics and Physical Sciences, University of Exeter, Exeter, EX4 4QF, United Kingdom

<sup>5</sup> Key Laboratory of Drinking Water Science and Technology, Research Center for Eco-Environmental Sciences, the Chinese Academy of Sciences, Beijing 100085, China

\*To whom correspondence should be addressed. Phone/Fax.: +86 62911425. E-mail: xuwang@rcees.ac.cn (X. Wang)

†These authors contributed equally to this work.

## Notation

|             |                                                     |
|-------------|-----------------------------------------------------|
| $X_S$       | Slowly biodegradable substrates                     |
| $X_{Sads}$  | Adsorbed substrates                                 |
| $S_O$       | Dissolved oxygen                                    |
| $S_S$       | Readily biodegradable organic substrates            |
| $X_I$       | Inert particulate organic material                  |
| $X_H$       | Active heterotrophic organisms                      |
| $X_{STO}$   | Internal storage product of heterotrophic organisms |
| $Y_{H,S}$   | Yield coefficient for direct growth                 |
| $Y_{H,STO}$ | Yield coefficient for growth on stored products     |
| $Y_{STO}$   | Yield of stored products on $S_S$                   |
| $k_{ads}$   | Substrate adsorption rate                           |
| $q_m$       | Saturation constant for absorption                  |
| $k_H$       | Hydrolysis rate constant                            |
| $f_{STO}$   | Ratio of substrate utilized for storage             |
| $q_{max}$   | Maximum substrate uptake rate                       |
| $u_{H,STO}$ | Maximum growth rate on stored products              |
| $K_O$       | Half saturation constant for $S_O$                  |
| $K_S$       | Half saturation constant for substrate $S_S$        |
| $K_{STO}$   | Half saturation constant for storage substance      |
| $K_X$       | Half hydrolysis saturation constant                 |
| $b_H$       | Endogenous respiration rate of heterotrophs         |
| $b_{STO}$   | Endogenous respiration rate of storage products     |
| $f_i$       | Fraction of inert particulate substance             |

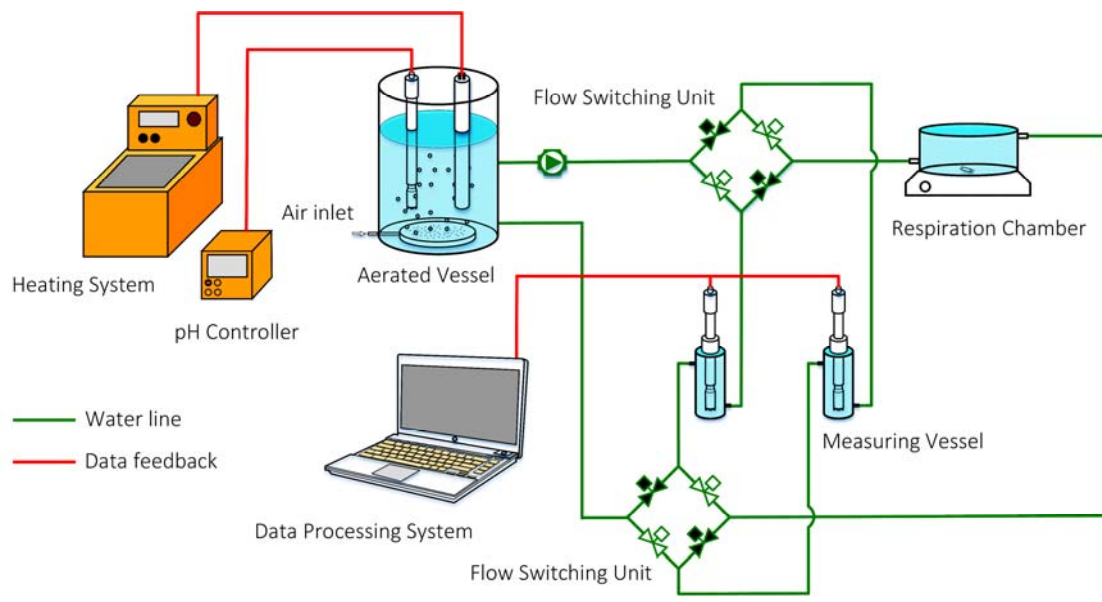

**Figure S1** A schematic illustration of the proposed activated sludge respirometer.

**Table S1** Kinetic and stoichiometric parameters for different substrates.

| Parameters                       | Substrates |      |       |       | Source     |
|----------------------------------|------------|------|-------|-------|------------|
|                                  | HAc        | HPr  | SolS  | BSA   |            |
| $Y_{H,S}$ (mg COD/mg COD)        | 0.57       | 0.56 | 0.63  | 0.55  | this study |
| $Y_{H,STO}$ (mg COD/mg COD)      | 0.65       | 0.63 | 0.65  | 0.60  | this study |
| $Y_{STO}$ (mg COD/mg COD)        | 0.81       | 0.76 | 0.92  | 0.74  | this study |
| $k_{ads}$ (h <sup>-1</sup> )     | -          | -    | 15.0  | 15.0  | ref 1      |
| $q_m$ (mg COD/mg COD)            | -          | -    | 0.071 | 0.098 | this study |
| $k_H$ (d <sup>-1</sup> )         | -          | -    | 0.91  | 0.85  | this study |
| $f_{STO}$ (d <sup>-1</sup> )     | 0.67       | 0.45 | 0.72  | 0.45  | this study |
| $q_{max}$ (d <sup>-1</sup> )     | 4.4        | 1.8  | -     | -     | this study |
| $\mu_{H,STO}$ (d <sup>-1</sup> ) | 1.1        | 1.3  | 1.2   | 1.1   | this study |
| $K_O$ (mg/L)                     | 0.2        | 0.2  | 0.2   | 0.2   | ref 2      |
| $K_S$ (mg COD/L)                 | 0.7        | 0.7  | -     | -     | ref 2      |
| $K_{STO}$ (mg COD/mg COD)        | 0.5        | 0.4  | 0.4   | 0.5   | this study |
| $K_X$ (mg COD/mg COD)            | -          | -    | 0.05  | 0.01  | this study |
| $b_H$ (d <sup>-1</sup> )         | 0.2        | 0.2  | 0.2   | 0.2   | ref 3      |
| $b_{STO}$ (d <sup>-1</sup> )     | 0.2        | 0.2  | 0.2   | 0.2   | ref 3      |
| $f_i$ (-)                        | 0.2        | 0.2  | 0.2   | 0.2   | ref 3      |

**Table S2** Matrix of the proposed kinetic model.

| Process                             | $X_S$ | $X_{Sads}$ | $S_o$           | $S_s$        | $X_I$ | $X_H$ | $X_{STO}$      | Kinetics                                                                                                          |
|-------------------------------------|-------|------------|-----------------|--------------|-------|-------|----------------|-------------------------------------------------------------------------------------------------------------------|
| Adsorption                          | -1    | 1          |                 |              |       |       |                | $k_{ads} \cdot \frac{q_m - (X_{sads}/X_H)}{q_m} \cdot X_S$                                                        |
| Hydrolysis                          |       | -1         |                 | 1            |       |       |                | $k_H \cdot \frac{(X_{sads}/X_H)}{K_X + (X_{sads}/X_H)} \cdot X_H$                                                 |
| Growth on $S_s$                     |       |            | $1-1/Y_{H,S}$   | $-1/Y_{H,S}$ |       | 1     |                | $f_{STO} \cdot q_{max} \cdot Y_{STO} M_O \cdot M_S \cdot X_H$                                                     |
| Storage of $S_s$                    |       |            | $1-1/Y_{STO}$   | $-1/Y_{STO}$ |       |       | 1              | $(1 - f_{STO}) \cdot q_{max} \cdot Y_{H,S} \cdot M_O \cdot M_S \cdot X_H$                                         |
| Growth on $X_{STO}$                 |       |            | $1-1/Y_{H,STO}$ |              |       | 1     | $-1/Y_{H,STO}$ | $\mu_{H,STO} \cdot M_O \cdot \frac{(X_{STO}/X_H)}{K_{STO} + (X_{STO}/X_H)} \cdot \frac{K_S}{S_S + K_S} \cdot X_H$ |
| Endogenous respiration              |       |            | $f_i-1$         |              | $f_i$ | -1    |                | $b_H \cdot M_O \cdot X_H$                                                                                         |
| Endogenous respiration of $X_{STO}$ |       |            | -1              |              |       |       | -1             | $b_{STO} \cdot M_O \cdot X_{STO}$                                                                                 |

M stands for a Monod kinetic function e.g.  $M_S = S_S / (K_S + S_S)$ .

## References

1. Karahan, O.; van Loosdrecht, M. C.; Orhon, D. Modeling the utilization of starch by activated sludge for simultaneous substrate storage and microbial growth. *Biotechnol. bioeng.* **2006**, *94* (1), 43-53.
2. Sin, G.; Vanrolleghem, P. A. Extensions to modeling aerobic carbon degradation using combined respirometric-titrimetric measurements in view of activated sludge model calibration. *Water Res.* **2007**, *41* (15), 3345-3358.
3. Gujer, W.; Henze, M.; Mino, T.; van Loosdrecht, M. Activated Sludge Model No. 3. *Water Sci. Technol.* **1999**, *39* (1), 183-193.
